# Supplementary material
Source: PubMed Central journal article supplement (PMC554820)

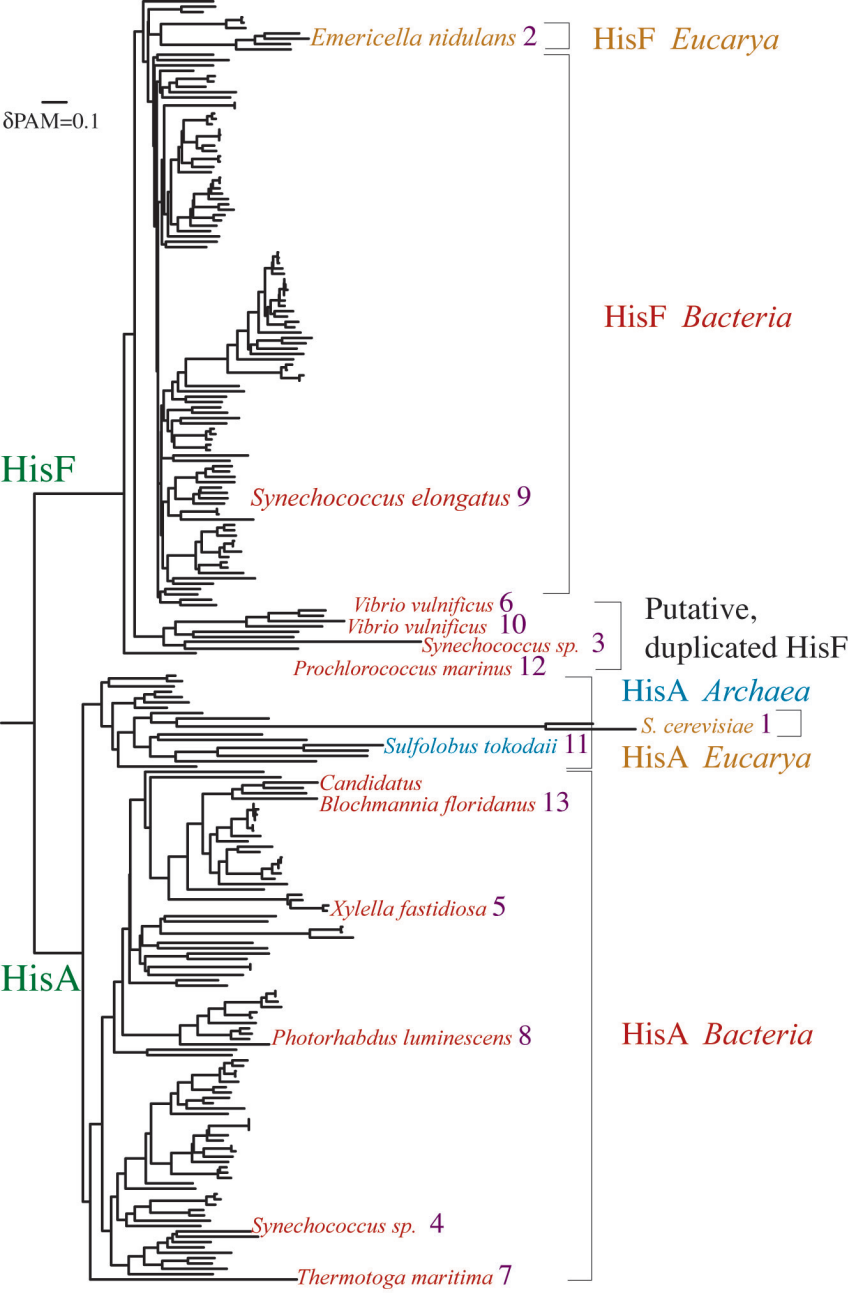

Supplement: pnas_102_11_4045__2.pdf [file pnas_102_11_4045__2.pdf]
